# Supplementary material for: Significance of the Prostate Central Gland and Total Gland Volume Ratio in the Diagnosis of Prostate Cancer Patients in the PSA Gray Zone
Source: Research Square preprint supplement (doi:10.21203/rs.3.rs-402955/v1), 2021-04-20
Supplement: Supplementary file 1 [file 31a627cf576618b42271c1a1.docx]

**Table 2** Comparison of PCa group and non-PCa group

| **Variable** | **PCa group**  （n=39）  M±SD | **Non-PCa group**  （n=97）  M±SD | **P value** |
| --- | --- | --- | --- |
| PSA(ng/ml,±s) | 6.64±1.57 | 6.54±2.01 | 0.2117 |
| f/tPSA(±s) | 0.15±0.07 | 0.17±0.06 | 0.0731 |
| PSAD(ng/ml/cm3,±s) | 0.25±0.12 | 0.16±0.08 | 0.0004* |
| PVc/PV(±s) | 0.41±0.14 | 0.63±0.15 | 0.0000* |

**Notes**: **P*: statistical difference.

**Abbreviations**: M±SD, mean ± standard deviation.
